# Supplementary material for: A new method to measure oxygen solubility in organic solvents through optical oxygen sensing
Source: Royal Society of Chemistry journal article supplement (doi:10.1039/c3an36782g), 2013-01-01
Supplement: c3an36782g.pdf [file c3an36782g.pdf]

# Supporting Information

## for

### Alternative method to measure oxygen solubility in organic solvents through optical oxygen sensing

Michela Quaranta, Michael Murkovic and Ingo Klimant

#### Table of content

|                                                                              |      |
|------------------------------------------------------------------------------|------|
| 1) Oxygen sensitive indicator                                                | p S1 |
| Fig.S.1 Absorption and corrected emission spectra of PtTPTBPF in polystyrene | p S1 |
| 2) Calibration of the sensor                                                 | p S2 |
| Fig. S.2 Lifetime vs oxygen partial pressure                                 | p S2 |
| Fig. S.3 Response time of the capillary sensor                               | p S2 |

#### 1) Oxygen sensitive indicator

The oxygen-sensitive indicator employed to make the capillary sensor was the platinum(II)-*meso*-tetra(4-fluorophenyl)tetrabenzoporphyrin (PtTPTBPF). This NIR porphyrin was selected because it can be excited at wavelength higher than 600 nm and therefore is compatible with the measuring device used (Firesting – oxygen meter). The spectral characteristics and the chemical structure are shown in figure SI.1. Furthermore this dye is characterized by high photostability and low tendency to aggregate in polystyrene.

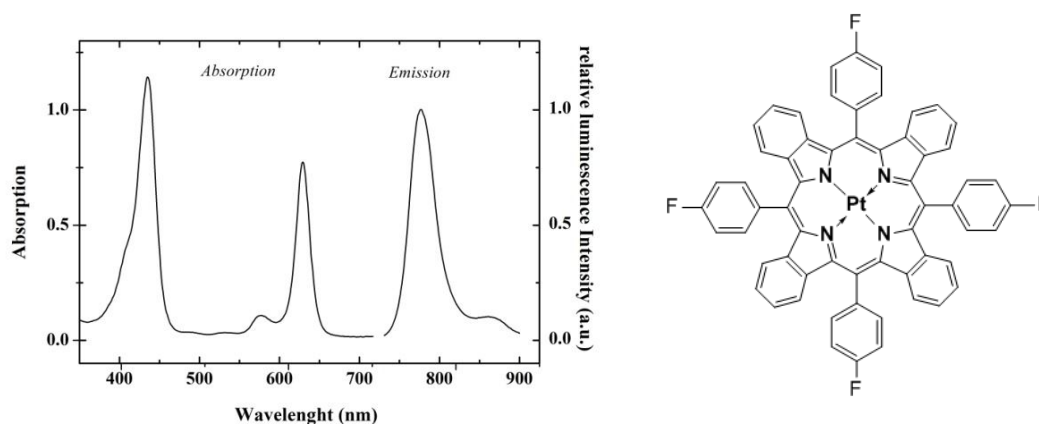

**Fig. S.1** Left: absorption and corrected emission spectra of PtTPTBPF in polystyrene. Right: chemical structure of the platinum(II)-*meso*-tetra(4-fluorophenyl)tetrabenzoporphyrin (PtTPTBPF)

## 2) Calibration of the sensor

As reported in the paper the capillary sensor was calibrated in water, methanol, ethanol and propan-2-ol. Here we report the plots of lifetime vs oxygen partial pressure.

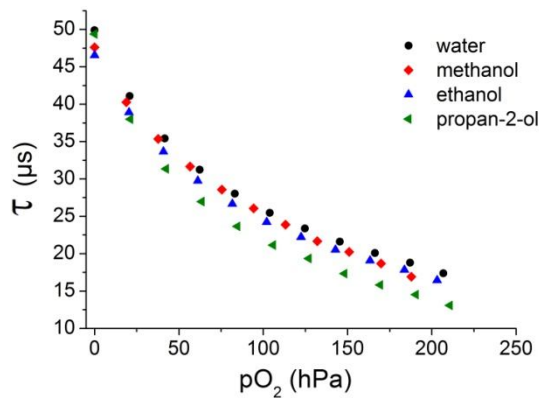

**Fig. S.2** Plots of lifetime ( $\tau$ ) vs oxygen partial pressure.

The Stern-Volmer plots (Figure 1 in the paper) were fitted with the following modified Stern-Volmer equation (two-site model)

$$\frac{I}{I_0} = \frac{\tau}{\tau_0} = \frac{f}{1+K_{sv1}pO_2} + \frac{1-f}{1+K_{sv2}pO_2} \quad \text{Equation 1}$$

Where  $f$  represents the fraction of the total emission for the first site and  $K_{sv1}$  and  $K_{sv2}$  are the Stern-Volmer quenching constants for the two sites.

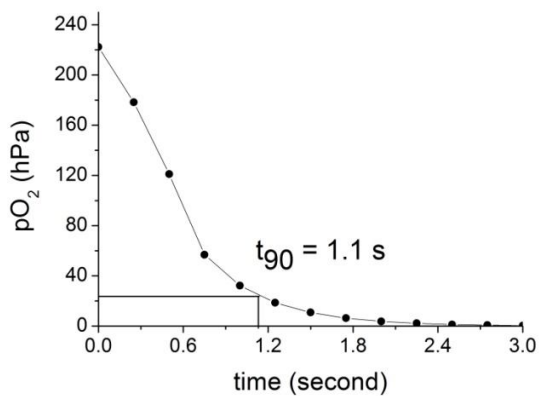

**Fig. S.3** Response time of the capillary sensor.
